# Supplementary material
Source: PubMed Central journal article supplement (PMC3961651)
Supplement: supp_M113.545178_jbc.M113.545178-1.pdf [file supp_M113.545178_jbc.M113.545178-1.pdf]

## Supplementary Material

### Context-dependent Cooperation Between NF- $\kappa$ B and the Glucocorticoid Receptor at a TNFAIP3 enhancer: A Mechanism to Maintain Negative Feedback Control of Inflammation

Mohammed O. Altonsy, Sarah K. Sasse, Tzu L. Phang and Anthony N. Gerber

**Table S1**

| <b>qPCR primers</b> | Forward Sequence (5'→3')           | Reverse Sequence (5'→3')        |
|---------------------|------------------------------------|---------------------------------|
| IL1 $\alpha$        | CAT CCT CCA CAA TAG CAG ACA G      | GAG TTT CCT GGC TAT GGG ATA AG  |
| IL1 $\beta$         | CAAAGGCGGCCAGGATATAA               | CTAGGGATTGAGTCCACATTGAG         |
| IL6                 | TGA CCC AAC CAC AAA TGC            | AGG AAC TCC TTA AAG CTG CG      |
| IL8                 | CTT GGC AGC CTT CCT GAT TT         | GGG TGG AAA GGT TTG GAG TAT G   |
| TNF                 | AGAGGGAGAGAAGCAACTACA              | GGGTCAGTATGTGAGAGGAAGA          |
| HBEGF               | AGC TCT TTC TGG CTG CAG TTC<br>TCT | TCC AGA TCT GCC TCT TGC AAG TCA |
| TNFAIP3             | AGTGTTCCTCCAGGTGGCCTTAGAAA         | TCTCAGCCAAGACGATGAAGCAGT        |
| TNIP1               | AACAAGCAGTGGGACCAGCATTTC           | TGCTTCTGCAAATCAGCCAGCTTC        |
| TNIP2               | TCTGCCTCGAACCAGTCAAATGGA           | AACTTCCGGCTGGATGACAAATGC        |
| NFKBIA              | GAG TTA CCT ACC AGG GCT ATT C      | CTC TCC TCA TCC TCA CTC TCT     |
| DUSP1               | ATGCTCCTTGAGAGGAGAAATG             | GAGGAACTCGGGTGAAGTTAAA          |

**Table S2**

| <b>ChIP Primers &amp; Sequence location</b> | Forward Sequence (5'→3')      | Reverse Sequence (5'→3')       |
|---------------------------------------------|-------------------------------|--------------------------------|
| FKBP5<br>(+134724 /<br>+134941)             | TAA CCA CAT CAA GCG AGC<br>TG | GCA TGG TTT AGG GGT TCT TG     |
| IL8<br>(-65 /+15)                           | GAGCACTCCATAAGGCACAA          | TTCCTTCCGGTGGTTTCTTC           |
| IL1 $\beta$<br>(-468/-346)                  | TACAGACAGGGAGGGCTATT          | GTGGGACAAAGTGAAGACA            |
| IL1 $\beta$<br>(+24420/+24505)              | GATGGAGGCTCAGGTCTAATG         | CGTGTCTCAGGCTCTCATTT           |
| TNFAIP3<br>(+49/+135)                       | GTC TAC CTG GCG TTG GTT T     | CTC AAC TCC CAG CAC TTC AA     |
| TNFAIP3<br>(+5936/+6047)                    | GCTGTTGCTCAATTGCTAGTC         | CTTCTTGTGCTTACTTTTCAGTTCT<br>T |
| NFKBIA<br>(-306/-189)                       | CTTGACAGAGGGACAGGATTAC        | GTCACGGACAGGGAACTTT            |
| NFKBIA<br>(+1033/+1129)                     | CCTTCCTCAACTTCCAGAACA         | GTGACTCTGCTACATCAGCTAC         |

**Table S3**

| Cloning Primers | Forward Sequence (5'→3') | Reverse Sequence (5'→3') |
|-----------------|--------------------------|--------------------------|
| TNFAIP3I2       | GAGGGTTCTTCAAAGGCAATATC  | GCCATTAATCTGTGACCTTTCC   |

**Table S4**

| SDM Primers                      | Forward Sequence (5'→3')                                                                      | Reverse Sequence (5'→3')                                                                     |
|----------------------------------|-----------------------------------------------------------------------------------------------|----------------------------------------------------------------------------------------------|
| TNFAIP3I2 (mut GBS)              | GGTGCACCTTCGCAGTTTAAATG<br>TCTACACACCATCACATATGGT<br>CCGATAGCTGTTGCTCAATTGC<br>TAGTCAAATAACTT | AAGTTATTTGACTAGCAATTGAGCAA<br>CAGCTATCGGACCATATGTGATGGT<br>GTGTAGACATTTAAACTGCGAAGTGC<br>ACC |
| TNFAIP3I2/F<br>KBP5 GBS-<br>swap | CACTTCGCAGTTTAAATGTCTAC<br>ACACCAGAACAGGGTGTCTAT<br>AGCTGTTGCTCAATTGCTAGTC<br>AAATAACTTA      | TAAGTTATTTGACTAGCAATTGAGCA<br>ACAGCTATAGAACACCCTGTTCTGGT<br>GTGTAGACATTTAAACTGCGAAGTG        |

**TNFAIP3I2 NF $\kappa$ B-BS1, NF $\kappa$ B-BS2 and GR-BS Sequence (5'→3')**

GAGCTCGGATCCACTAGTAACGGCCGCCAGTGTGCTGGAATTCGCCCTTGAGGGT  
TCTTCAAAGGCAATATCTGTTTGGGGAGGGGGTGATTCACAAGTTTGCATTTGAGG  
ATATGAGACTGCGGTGAATGAGGAAGGGAGTAGGTGGCATAAAATTGAACTTCAT  
GTGAAAAATTCCAGCGTCTATTGGCTGCAGCGATTTCACTTGTATAATGAGTAGCC  
CTATTCCAGCTCACCCCTGACCACACCCA **CTTGGAAGTCCAGG** GTGCACTTCGCA  
NF $\kappa$ B-BS1 5872-5887

GTTTAAATGTCTACACA **CCAGAACA AAAAGTACAAT** AGCTGTTGCTCAATTGCTAG  
GR-BS 5916-5935

TCAAATAACTTAGCA **CTGGGGAATTCCAGA** TGTTACTTAGGGAATTTTATACTGGT  
NF $\kappa$ B-BS2 5970-5985

CATCTCAATAAAGA ACTGAAAGTAAGCACAAGAAGAAAAAAGCCTTATCTTTGCTC  
TAGATTTTGCAAAGGGGAAATTTCAACAGAACGCAATCATTGCTACACGTCTGCCA  
AGACACAAGGCTTGGGCGATCTTTTTTTGTTCAATTTGTTTGAATACTTAGCTAGTTTTT  
CTAAATGTATACATTGAAGGAATACTGGCTGTGGAAGTATATTTGAGGGTTTTTTGG  
TTTTCTTTACAGTTTGACTGTAATTACAATTTGATAAAATTTCAAATAGCTCTATTGCC  
CTACTTATAGAGTAATGTAAGAAACAATGTAACTTTTTCATTATAAAAATTATTTTGCA  
CTTGCCAAAGGAGATTAAGGAGTTAACTTTTTTTGTTTTAAACATTCACCCCAAATAT  
TTATCGTTTGGGGGTTGAAAAAATGCAGCCATTGAATTGTGAGTTTTTAACTGGA  
AAGGTCACAGATTAATGGCAAGGGCGAATTCTGCAGATATCCATCACACTGGCGG  
CCG

Supplemental Figure 1

|          | NF- $\kappa$ B binding site 1<br><u>cttgaaagtccagg</u> |
|----------|--------------------------------------------------------|
| Human    | ca <b>cttgaaagtccagg</b> gtg                           |
| Rhesus   | ca <b>cttgaaagtccagg</b> gtg                           |
| Tarsier  | ca <b>cttgaaagtccagg</b> gtg                           |
| Mouse    | ca <b>cttgaaagtccagg</b> gtg                           |
| Dog      | ca <b>cttgaaagtccagg</b> gcg                           |
| Opossum  | ca <b>cttgaaagtccag</b> tatg                           |
| Platypus | ca <b>cttgaaagtccag</b> tatg                           |
| Chicken  | ccc- <b>gggaaagtccg</b> aggga                          |
| Lizard   | cact <b>tgaaagtccag</b> tatg                           |

  

|          | GR binding site 1<br><u>agaacaaaagtaca</u> |
|----------|--------------------------------------------|
| Human    | cc <b>agaacaaaagtaca</b>                   |
| Rhesus   | cc <b>agaacaaaagtaca</b>                   |
| Tarsier  | cc <b>agaacaaaagtaca</b>                   |
| Mouse    | cc <b>agaacaaaacgtaca</b>                  |
| Dog      | cc <b>agaacaaaagtaca</b>                   |
| Opossum  | cc <b>agaacaaaagtaca</b>                   |
| Platypus | cc <b>agaacaaaagtaca</b>                   |
| Chicken  | gc <b>agaacaaaagtacga</b>                  |
| Lizard   | tc <b>agaacaagaagtaca</b>                  |

  

|          | NF- $\kappa$ B binding site 2<br><u>ctggggaattccaga</u> |
|----------|---------------------------------------------------------|
| Human    | gc <b>ctggggaattccag</b> atgt                           |
| Rhesus   | gc <b>ctggggaattccag</b> atgt                           |
| Tarsier  | gc <b>ctggggaattccag</b> atgt                           |
| Mouse    | gc <b>ctggggaattcca</b> atgt                            |
| Dog      | gc <b>ctggggaattccag</b> atgt                           |
| Opossum  | gc <b>ctggggaattcca</b> agtgt                           |
| Platypus | aca <b>ctggggaattccag</b> atgt                          |
| Chicken  | g <b>ctggggaattcca</b> agtgt                            |
| Lizard   | gt <b>ctggggaattcca</b> agtgt                           |

**Figure S1. Cross-species conservation of a GR binding site and two NF- $\kappa$ B sites within TNFAIP3 intron 2.** Sequence alignments extracted from the UCSC genome browser for the indicated binding sites within the second intron of TNFAIP3. Conserved residues within each binding motif are shown in red.
